# Supplementary material
Source: Elsevier journal article supplement (https://www.sciencedirect.com/science/article/pii/S0300893224001155)

## MATERIAL ADICIONAL

### Tabla 1 del material adicional

Causas de tratamiento concomitante antiagregante plaquetario y anticoagulante al alta

|                                | AVK (n = 206) | ACOD (n = 91) |
|--------------------------------|---------------|---------------|
| <i>Causas del TAPD al alta</i> |               |               |
| ACTP reciente                  | 6/6 (100)     | 4/4 (100)     |
| <i>Causas de TAPS al alta</i>  |               |               |
| Enfermedad coronaria           | 30/59 (50,8)  | 11/17 (64,7)  |
| Enfermedad arterial            | 15/59 (25,4)  | 3/17 (17,6)   |
| (periférica o cerebral).       | 14/59 (23,7)  | 3/17 (17,6)   |
| Desconocido                    |               |               |

Los valores expresan n/N (%).

**Figura 1 del material adicional.** Curvas de Kaplan-Meier para la incidencia acumulada de eventos hemorrágicos tipo 3 o 4 de la escala VARC-3 en pacientes en tratamiento con AVK o con anticoagulantes orales de acción directa.

AVK: antagonistas de la vitamina K; DOAC: anticoagulantes orales de acción directa.

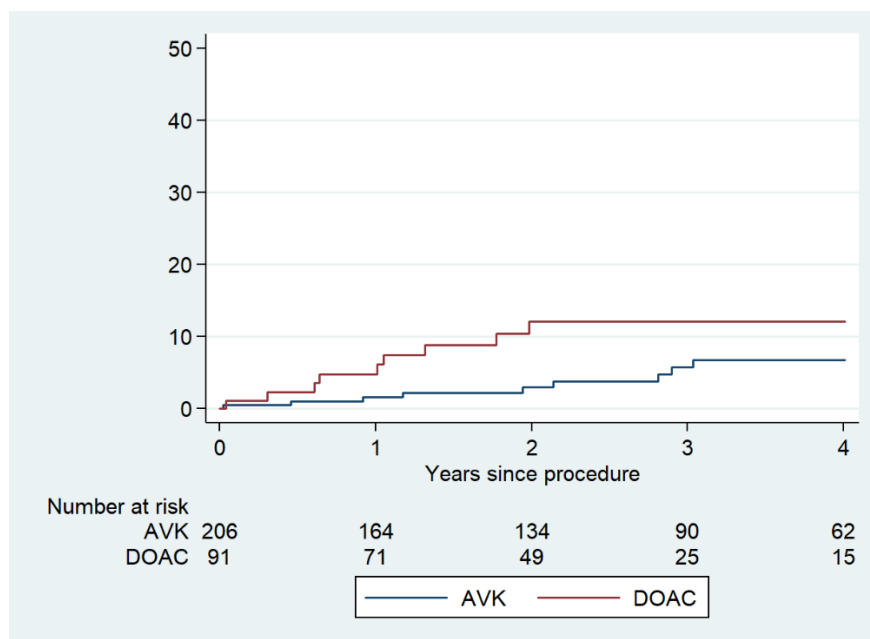

Supplement: mmc1 [file mmc1.pdf]
